# Supplementary material
Source: PubMed Central journal article supplement (PMC2671709)
Supplement: tpc.108.061960v2_1.pdf [file tpc.108.061960v2_1.pdf]

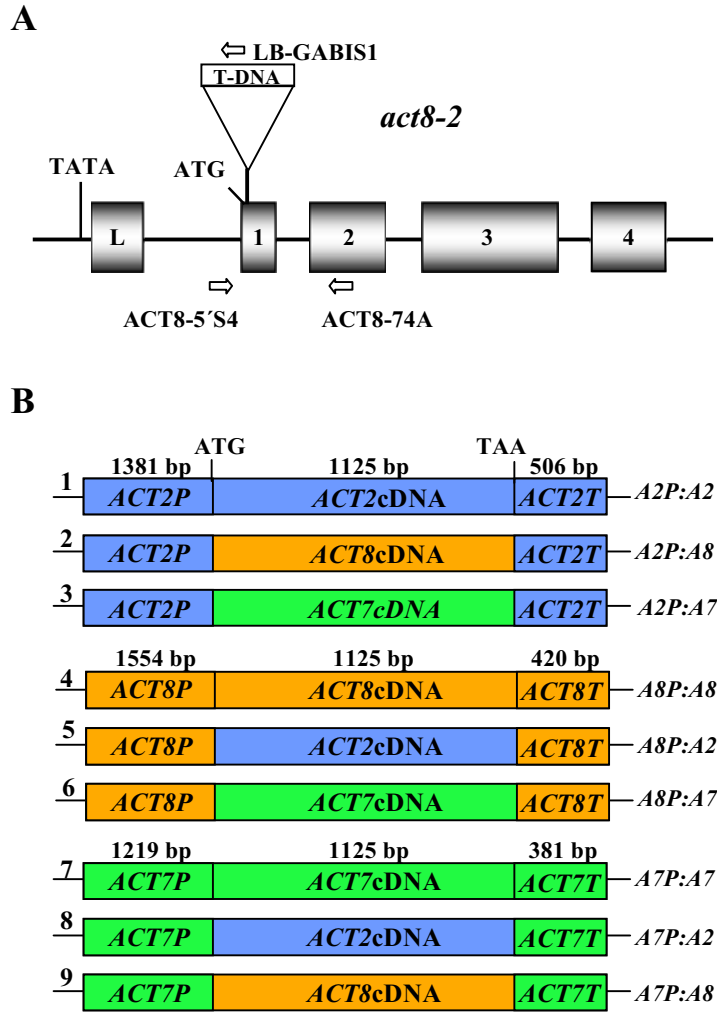

**Supplemental Figure 1.** *ACT8* Gene and Different Transgenic Constructs Used in Complementation/Suppression.

**(A)** Physical map of *act8-2* allele containing a T-DNA insertion at the ATG codon. The insertion deletes this codon along with 19 bases. The arrows indicate the location and orientation of primers that were used to distinguish native (*ACT8-5'S4* and *ACT8-74A*) and T-DNA mutant (*ACT8-5'S4* and *LB-GABIS1*) alleles. TATA box specifies the start of transcription. ATG = Start codon. L = Leader exon up-stream of exons 1, 2, 3 and 4.

**(B)** Actin overexpression constructs. Each of the nine different constructs are in three boxes (left box: promoter, 5' untranslated region, leader exon to initiation codon ATG of exon #1; middle box: cDNA from different vegetative actin genes; right box: 3' untranslated region and poly(A) sequences). TAA = Stop codon. *ACT2*, *ACT8* and *ACT7* regulatory and coding sequences are shown respectively in blue, orange and green.

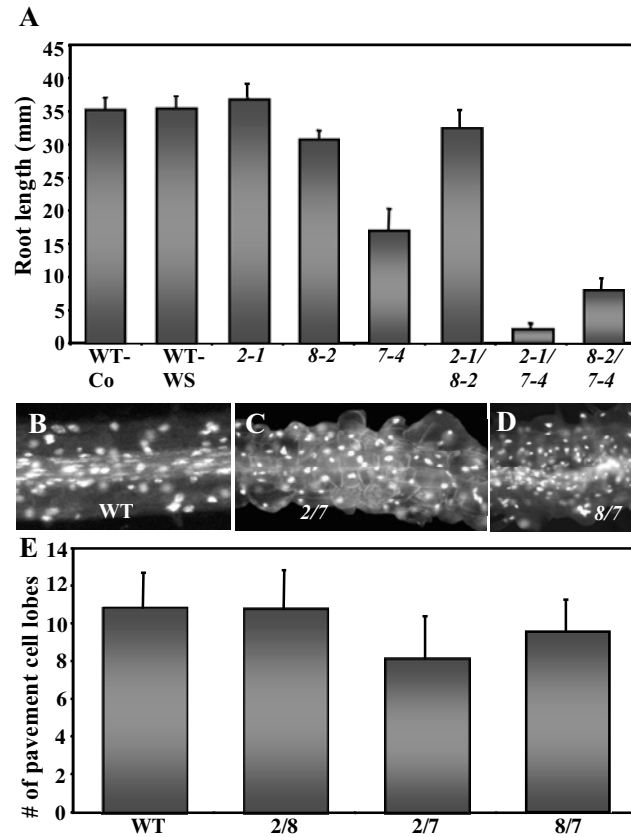

**Supplemental Figure 2.** Phenotypic Analysis of Vegetative Actin Single and Double Mutants.

**(A)** Root length of 10-day-old wild-type (Columbia [Co] and WS) and different mutant seedlings. N = 50. WT, wild-type; 2-1, *act2-1*; 8-2, *act8-2*; 7-4, *act7-4*; 2-1/8-2, *act2-1 act8-2*; 2-1/7-4, *act2-1 act7-4*; 8-2/7-4, *act8-2 act7-4*.

**(B-D)** DAPI stained root portions of wild type, and *act2-1 act7-4* (2/7) and *act8-2 act7-4* (8/7) double mutants.

**(E)** Bar graph showing differences in the number of pavement cell lobes between wild-type and different double mutants. N = 30.

The bars in **(A)** and **(E)** represent standard deviation.

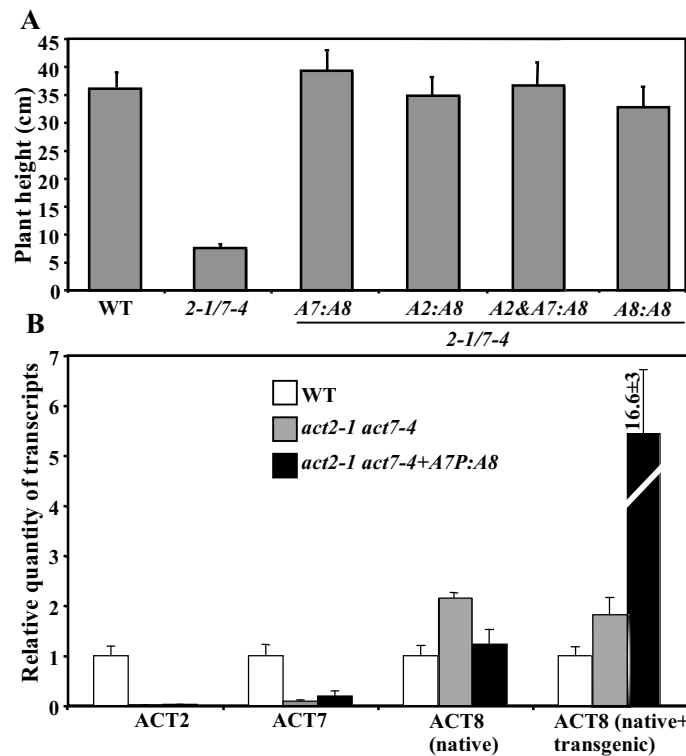

**Supplemental Figure 3.** Overexpression of ACT8 Restores Normal Plant Growth to *act2-1 act7-4* Double Mutants.

(A) Height of adult *act2-1 act7-4* (2-1/7-4) plants rescued by ACT8 expression under the control of *ACT7* (A7:A8), *ACT2* (A2:A8), *ACT8* (A8:A8), and *ACT2* and *ACT7* (A2&A7:A8) regulatory sequences. WT: wild-type. N = 20.

(B) qRT-PCR analysis of relative quantities of *ACT2*, *ACT7* and *ACT8* transcripts in wild-type, *act2-1 act7-4* double mutant and an *act2-1 act7-4* plant rescued with A7P:A8.

The data represent average values of two technical replicates.

The error bars in (A) and (B) correspond to standard deviation.

**Supplemental Table 1.** Relative Transcript Levels in the *act2-1 act7-4* Double Mutant Plants Overexpressing ACT8 Under the Control of Various Actin Promoters.

| Plant                | <i>ACT2</i> | <i>ACT7</i> | <i>ACT8</i> |
|----------------------|-------------|-------------|-------------|
| Wild-type            | 1.0         | 1.00        | 1.00        |
| <i>act2-1 act7-4</i> | 0           | 0.10        | 1.30        |
| KH-20 (A7P)          | 0           | 0.03        | 17.0        |
| BK-5 (A2P)           | 0           | 0.02        | 33.0        |
| BKH1-9 (A2&7P)       | 0           | 0.05        | 38.0        |
| KH8-7 (A8P)          | 0           | 0.03        | 4.00        |

**Supplemental Table 2.** Primers Used for Detection of Mutant Alleles and qRT-PCR.

ACT2 & act2-1 PCR Primers:

ACT2-173S: 5'-CTTCCTCAATCTCATCTTCTT-3'  
ACT2-AS : 5'-CATGACACCATGATGTCTTGGCCT-3'  
ACT2-173S : 5'-GCTCAGGATCCGATTGTCGTTTCCCGCCTT-3'  
Wild type: ACT2-173S & ACT2-AS; *act2-1*: ACT2-173S & ACT2-173S

ACT2 Real-Time Primers:

ACT2-3'-RT-S: 5'-GATGAGGCAGGTCCAGGAATC-3'  
ACT2-3'-RT-A: 5'-AACCCAGCTTTTTAAGCCTTT-3'

ACT7 & act7-4 PCR primers:

AAc7S: 5'-AGGATTCTTCTCGCTTCTGTTCGATCTCTCGCT-3'  
AAc7-I1A: 5'-AAATCATGATCAGTAGTCTTACACATGT-3'  
JLB7804: 5'-TTGGTAATTACTCTTTCTTTTCCTCCATATT-3'  
Wild-type: AAc7S & AAc7-I1A; *act7-4*: JLB7804 & AAc7-I1A

ACT7 Real-Time Primers:

ACT7-RT-S: 5'-AGTCATAACCATCGGAGCTGAGA-3'  
ACT7-RT-A: 5'-TGAGCGATGGCTGGAACA-3'

ACT8 & act8-2 PCR Primers:

ACT8-5'S4: 5'-TCGATCAAGATTCAGATCTTTATG-3'  
ACT8-74A: 5'-ACACCATGCTCAATAGGGTATTTCAAT-3'  
LB-GABIS1: 5'-CCCATTTGGACGTGAATGTAGACAC-3'  
Wild-type: ACT8-5'S4 & ACT8-74A; *act8-2*: ACT8-5'S4 & LB-GABIS1

ACT8 Real-Time Primers:

ACT8RTS2: 5'-AGCGGTTTTCCCGAGTGTT-3'  
ACT8RTA2: 5'-TTCTGATTCATCCCAACCATGA-3'  
ACT8-3'UTRrtS: 5'-TCCGGTTACAGCGTTTGGA-3'  
ACT8-3'UTRrtA: 5'-GCGAGAGCGGGTTTTCAA-3'  
Native: ACT8-3'UTRrtS & ACT8-3'UTRrtA  
Native + transgenic: ACT8RTS2 & ACT8RTA2

RPI16A Real-Time Primers:

RPS16A-real-S: 5'-TCTCGTTACCAGAAGAGTTACCG-3'  
RPS16A-real-A: 3'ACCTTGAGATGAATCGAAATTGA-3'
